# Supplementary material for: First-principles molecular dynamics study on the behaviors of Cs in a mixed system of liquid metal and LiCl–KCl molten salt
Source: Royal Society of Chemistry journal article supplement (doi:10.1039/d4cp02144d), 2024-01-01
Supplement: d4cp02144d1.pdf [file d4cp02144d1.pdf]

## First-principles molecular dynamics study on the behaviors of Cs in the mixed system of liquid metal and LiCl-KCl molten salt

Wentao Zhou<sup>1</sup>, Jia Song<sup>1</sup>, Lve Lin<sup>1</sup>, Xinyu Zhang<sup>1</sup>, Shaoqiang Guo<sup>2</sup>, Yafei Wang<sup>1,\*</sup>

<sup>1</sup>School of Nuclear Science and Engineering, Shanghai Jiao Tong University, Shanghai  
200240, China

<sup>2</sup>Shaanxi Key Laboratory of Advanced Nuclear Energy and Technology, School of Nuclear  
Science and Technology, Xi'an Jiao Tong University, Xi'an 710049, China

\* Yafei Wang: [itsme@sjtu.edu.cn](mailto:itsme@sjtu.edu.cn)

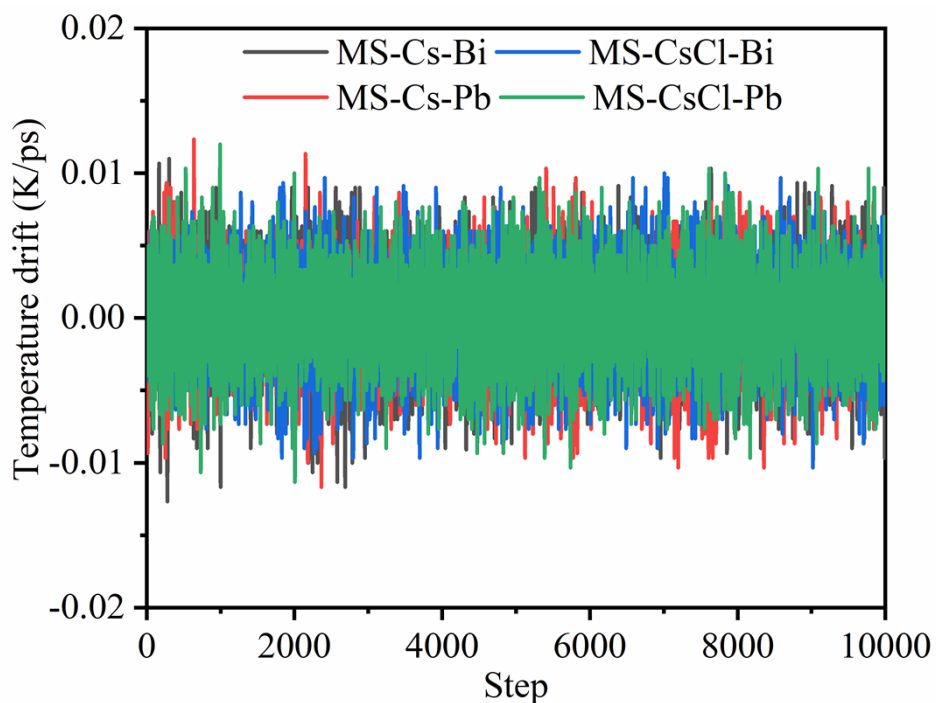

**Figure S1.** The temperature drift of the four systems during simulation process.

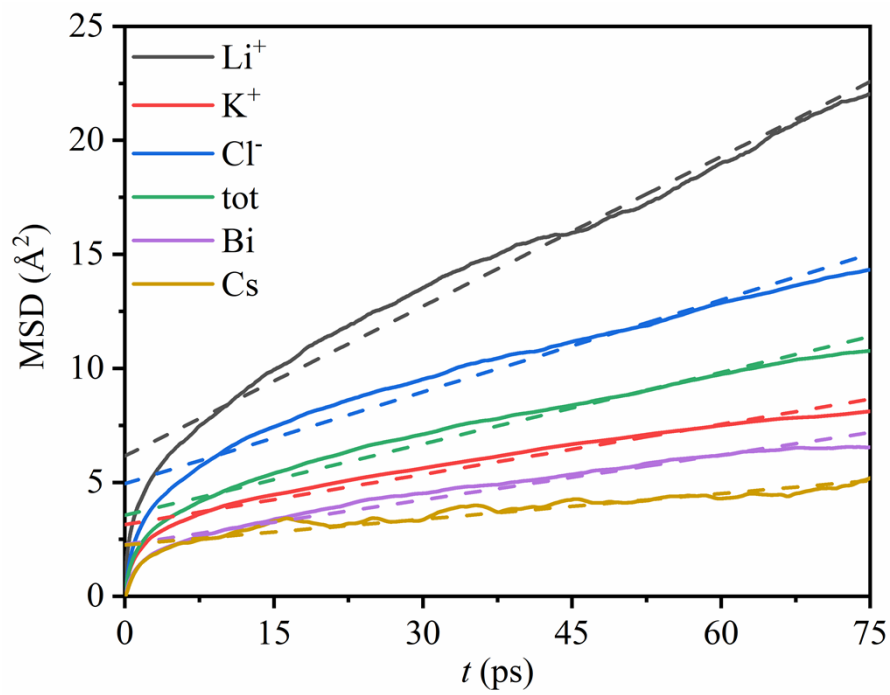

**Figure S2.** The MSD of each element in MS-Cs-Bi system for 75 ps. The dashed line is a linear fit.
